# Supplementary material for: Th1-Th17 Cells Contribute to the Development of Uropathogenic Escherichia coli-Induced Chronic Pelvic Pain
Source: PubMed Central journal article supplement (PMC3618515; doi:10.1371/journal.pone.0060987), 2013-04-05

# Figure S1

Methodology for testing pelvic pain behavior using Von Frey fibers

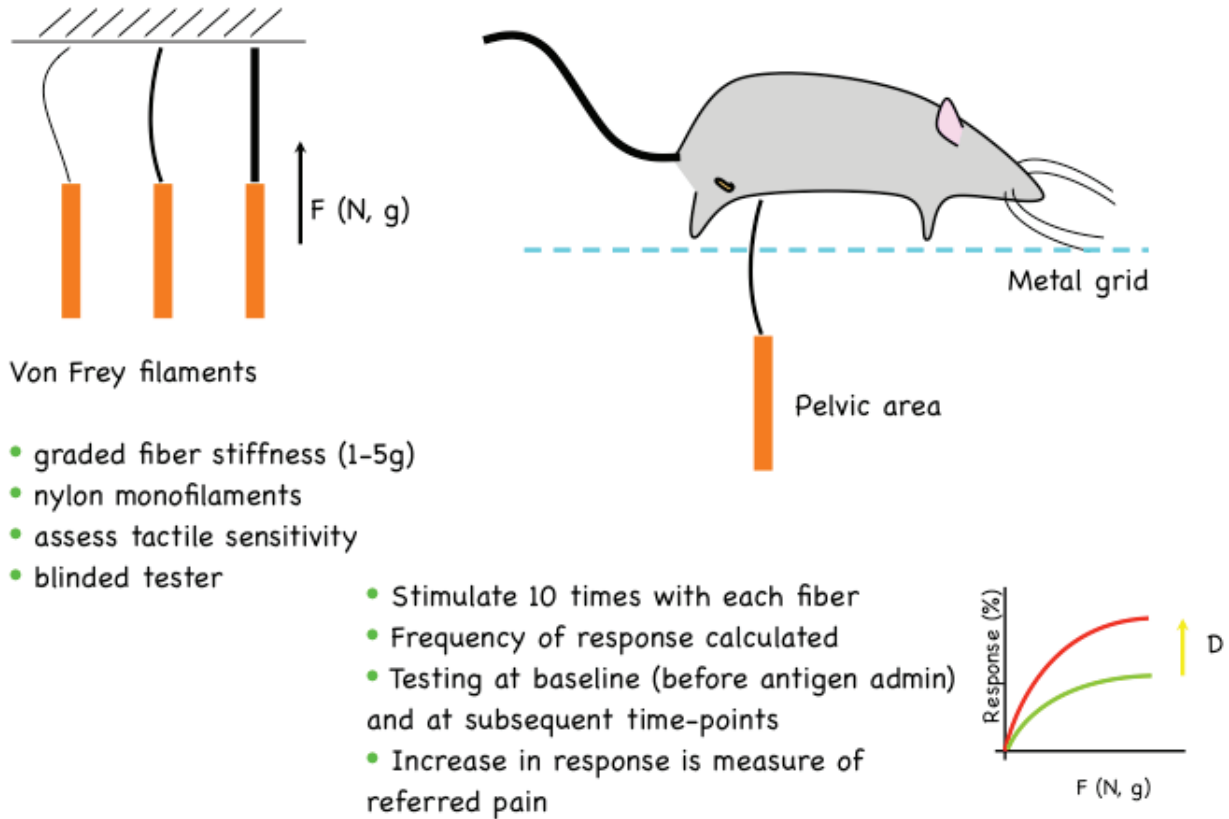

Supplement: pone.0060987.s001.pdf [file pone.0060987.s001.pdf]
